# Supplementary material
Source: Springer Nature journal article supplement (https://www.springermedizin.de/resource/supplementary/12936_2009_1138_MOESM1_ESM.pdf/9549952)
Supplement: MOESM1 [file 9549952]

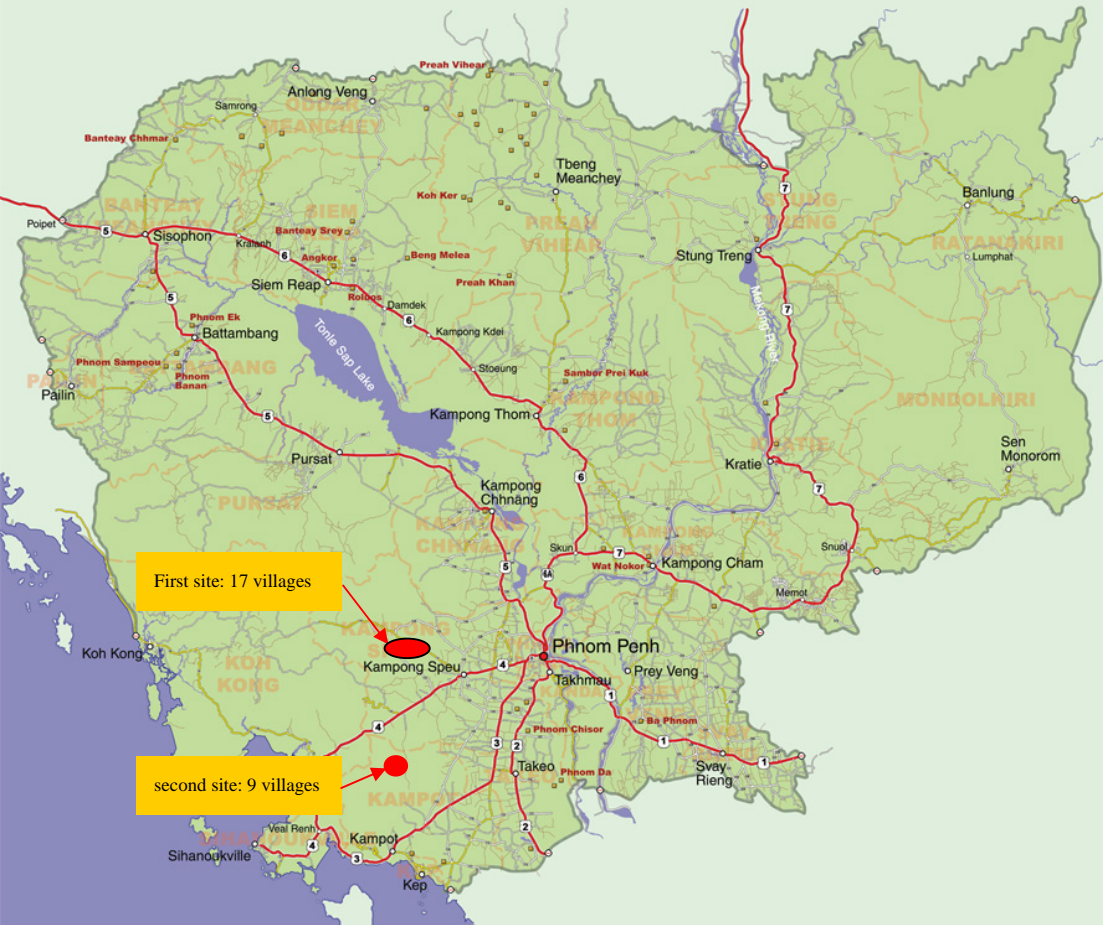

First site: 17 villages

second site: 9 villages

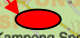

Phnom Penh

Takhmau

Phnom Chisor

Takeo

Phnom Da

Kampol

Keo

Prey Veng

Ba Phnom

Svay Rieng

Tonle Sap Lake

Mekong River
